# Supplementary material for: First evidence of yawn contagion in a wild monkey species
Source: PubMed Central journal article supplement (PMC8429631; doi:10.1038/s41598-021-96423-3), 2021-09-09
Supplement: 41598_2021_96423_MOESM1_ESM.pdf [file 41598_2021_96423_MOESM1_ESM.pdf]

## SUPPLEMENTARY MATERIAL

### YAWN CONTAGION GOES WILD: FIRST EVIDENCE IN A FREE-RANGING MONKEY SPECIES

Alessandro Gallo<sup>a</sup>, Anna Zanolli<sup>a</sup>, Marta Caselli<sup>a</sup>, Elisabetta Palagi<sup>b,c\*</sup>/Ivan Norscia<sup>a,b\*</sup>

<sup>a</sup> Department of Life Sciences and Systems Biology, University of Torino, Via Accademia Albertina 13, 10123 Torino (Italy)

<sup>b</sup> Natural History Museum, University of Pisa, Via Roma 79, 56011 Calci (Pisa, Italy)

<sup>c</sup> Unit of Ethology, Department of Biology, University of Pisa, Via Alessandro Volta 6, 56126 Pisa (Italy)

#### Video S1 - Legend

Yawn contagion between gelada males from two different OMUs on the Kundi plateau Ethiopia

**Raw data:** attached csv file

**Supplementary Table S1** - Results of the GLMMs performed considering 1min (GLMM<sub>1</sub>) and 2min (GLMM<sub>2</sub>) time window from the triggering yawn. Fixed factors: Perception (Yes/No), Group membership (Same/Different), Distance (Proximity/Non-proximity), Time slot (09:01-12:00/12:01-15:00), Sex Trigger (Male/Female), Sex Responder (Male/Female), Yawn duration, Yawn type (Covered Teeth/Uncovered Teeth/Uncovered Gums), Yawn vocalization (Presence/Absence). Random factors: group identity of the dyad. GLMM<sub>1</sub>: The full model is not significantly different from the null model, therefore no yawn contagion could be detected within 1 min from the triggering stimulus. GLMM<sub>2</sub>: the full model is significantly different from the null model. Perception, Group membership and responder sex had a significant effect as it occurs in the 3-min time window (Table 1 in the main text of the article).

**Table S1**

---

**GLMM<sub>1</sub> performed on 1min time window.**

Dependent variable=yawning performed by a subject within one minute from others' yawns (binomial: present=1; absent=0). Full-model not significantly different from null-model:  $\chi^2=16.776$ ,  $df = 10$ ,  $p=0.080$ .

---

**GLMM<sub>2</sub> performed on 2min time window.**

Dependent variable=yawning performed by a subject within two minutes from others' yawns (binomial: present=1; absent=0). Full- versus null-model:  $\chi^2=29.895$ ,  $df = 10$ ,  $p<0.001$ .

| <b>Fixed Effects</b>                        | <b>Estimate</b> | <b>SE</b> | <b><i>z value</i></b> | <b><i>p value</i></b> |
|---------------------------------------------|-----------------|-----------|-----------------------|-----------------------|
| Intercept                                   | -0.894          | 2.185     | -0.409                | a                     |
| Perception (Yes) <sup>b,c</sup>             | 2.505           | 0.974     | 2.572                 | <b>0.010</b>          |
| Group membership (Same) <sup>b,c</sup>      | -2.937          | 1.304     | -2.253                | <b>0.024</b>          |
| Distance (Non-proximity) <sup>b,c</sup>     | -1.044          | 1.190     | -0.877                | 0.381                 |
| Time slot (12:01-15:00) <sup>b,c</sup>      | 1.233           | 0.935     | 1.319                 | 0.187                 |
| Sex Trigger (Female) <sup>b,c</sup>         | 0.210           | 0.916     | 0.230                 | 0.818                 |
| Sex Responder (Female) <sup>b,c</sup>       | -1.384          | 0.648     | -2.136                | <b>0.033</b>          |
| Yawn duration                               | 0.418           | 0.847     | 0.494                 | 0.622                 |
| Yawn type (Uncovered gums) <sup>b,c</sup>   | -0.292          | 0.790     | -0.370                | 0.711                 |
| Yawn type (Uncovered teeth) <sup>b,c</sup>  | -1.639          | 1.230     | -1.333                | 0.182                 |
| Yawn vocalization (Presence) <sup>b,c</sup> | -1.550          | 1.082     | -1.433                | 0.152                 |

---

<sup>a</sup> Not shown as not having a meaningful interpretation.

<sup>b</sup> Estimate  $\pm$  SE refers to the difference of the response between the reported level of this categorical predictor and the reference category of the same predictor.

*‘These predictors were dummy coded, with the “Perception (NO)”, “Group membership (Different)”, “Distance (Proximity)”, “Time slot (09:01-12:00)”, “Sex Trigger (Male)”, Sex Responder (Male)”, “Yawn vocalization (Absent)”, “Yawn type (Covered teeth)”, being the reference categories.*
